# Supplementary material for: Identification of A Novel Class of Benzofuran Oxoacetic Acid-Derived Ligands that Selectively Activate Cellular EPAC1
Source: Cells. 2019 Nov 12;8(11):1425. doi: 10.3390/cells8111425 (PMC6912754; doi:10.3390/cells8111425)
Supplement: Supplementary file 1 [file cells-08-01425-s001.zip › cells-624023-supplementary table_for resubmission.xlsx]

## Sheet: Hit Improvement Data
		Pharmacology assay data				Calculated physiochemical properties							Efficiency
Compound Name	Structure	EPAC1 pIC50 (mean)	EPAC1 selectivity	EPAC2 pIC50 (mean)	EPAC2 selectivity	MW	LOGD	ALOGP	HBA	HBD	PSA	FSP3	EPAC1 LE	EPAC1 LipE
ESC1000851 (SY000)		4.9	0.6	5.1	1.6	351.3	2.2	3.7	4	2	97	0.15	0.26	2.61
ESC1000852		<4	1	<4	1	379.4	4.3	4.3	4	1	86	0.23	0.2	-0.28
ESC1000853		<4	1	<4	1	279.3	3	3.9	2	1	56	0.17	0.27	1.02
ESC1000854		<4	1	<4	1	275.3	4.7	4.7	2	0	54	0.11	0.27	-0.68
ESC1000906		4.6	0.3	5.1	3.2	416.2	2.5	4	4	2	97	0.11	0.25	2.05
ESC1000907		4.7	0.8	4.8	1.3	337.3	1.8	3.2	4	2	97	0.11	0.26	2.9
ESC1000915		<4	1	<4	1	337.3	2.2	3.7	4	2	97	0.11	0.22	1.77
ESC1000919		<4	1	<4	1	343.5	3	4.3	4	1	37	0.57	0.22	0.96
ESC1000960		<4	1	<4	1	365.3	2.5	3.9	4	1	88	0.19	0.21	1.55
ESC1001000		<4	1	<4	1	390.3	3.1	3.1	4	2	98	0.14	0.19	0.95
ESC1001020		<4	1	<4	1	323.3	3.7	3.7	4	0	57	0.16	0.23	0.35
ESC1001041		<4	1	<4	1	309.3	2	3.5	4	1	68	0.11	0.24	2.05
ESC1001264 (SY002)		<4	0.4	4.4	2.5	322.3	1.8	3.3	3	2	71	0.16	0.23	2.16
ESC1001466 (SY001)		<4	0.8	4.1	1.3	322.3	1.8	3.3	3	2	71	0.16	0.23	2.16
ESC1001486		<4	1	<4	1	338.3	0.5	2	4	2	87	0.21	0.22	3.5
ESC1001487		<4	1	<4	1	338.3	0.5	2	4	2	87	0.21	0.22	3.5
ESC1001488		<4	1	<4	1	337.3	1.4	2.9	4	2	84	0.21	0.22	2.56
ESC1001531		4.1	0.4	4.4	2.2	303.3	1.2	2.7	4	2	97	0.31	0.26	2.83
ESC1001536		4.3	0.4	4.765	2.5	338.3	0.6	2.1	5	2	110	0.11	0.24	3.65
ESC1001546		<4	0.6	4.2	1.6	340.3	0.5	2	5	3	113	0.17	0.22	3.48
ESC1001547		<4	0.2	4.7	5	340.3	0.1	1.6	5	3	113	0.17	0.22	3.9
ESC1001548		4.3	0.4	4.7	2.5	338.3	0.6	2.1	5	2	109	0.11	0.24	3.7
ESC1001549		<4	1	<4	1	351.3	1.3	2.8	5	2	101	0.16	0.22	2.72
ESC1001550		<4	1	<4	1	353.3	0.8	2.3	5	3	104	0.21	0.22	3.22
ESC1001551		<4	1	<4	1	179.1	-0.7	0.7	3	2	66	0.11	0.43	4.74
ESC1001552		4	1	4	1	195.1	-1	0.5	4	3	87	0.11	0.4	5.01
ESC1001568		4	1	4	1	337.3	1.1	2.6	4	3	97	0.16	0.22	2.91
ESC1001568		4	1	4	1	337.3	1.1	2.6	4	3	97	0.16	0.22	2.91
ESC1001569		<4	1	<4	1	366.4	2.6	2.6	4	1	76	0.29	0.21	1.45
ESC1001581		4	0.3	4.6	4	337.3	2.4	3.9	3	2	80	0.2	0.22	1.61
ESC1001588		4.2	0.7	4.435	1.4	395.4	2.5	3.9	5	2	106	0.23	0.2	1.74
ESC1001595		4.9	0.4	5.2	2.2	371.7	2.4	3.9	4	2	97	0.11	0.26	2.43
ESC1001596		<4	1	<4	1	338.4	0.8	-0.1	4	2	70	0.3	0.22	3.17
ESC1001597		<4	1	<4	1	352.3	1.2	2.7	4	3	92	0.2	0.22	2.77
ESC1001602		4.9	1	4.9	1	367.3	1.7	3.2	5	2	106	0.15	0.25	3.11
ESC1001604		4.8	0.5	5.1	2	405.3	2.7	4.2	4	2	97	0.15	0.23	2.06
ESC1001605		4.4	0.6	4.6	1.6	352.3	1.1	2.6	4	3	109	0.11	0.23	3.22
ESC1001606		4.1	0.8	4.2	1.3	344.3	1	2.4	4	3	109	0.39	0.23	3.14
ESC1001607		4.1	1	4.1	1	366.3	1.1	2.6	4	3	109	0.15	0.21	2.96
ESC1001608		<4	1	<4	1	285.2	0.8	2.3	4	2	76	0.13	0.27	3.17
ESC1001609		<4	1	<4	1	422.4	0.8	2.3	6	2	116	0.27	0.18	3.23
ESC1001610		<4	1	<4	1	344.3	0.7	2.2	4	2	100	0.39	0.22	3.32
ESC1001616		<4	1	<4	1	271.2	0.8	2.3	4	2	76	0.07	0.28	3.17
ESC1001620		<4	1	<4	1	218.2	-0.4	1.1	3	3	82	0.09	0.35	4.37
ESC1001621		4.8	1.4	4.7	0.7	415.4	1.3	2.8	6	2	139	0.15	0.23	3.52
ESC1001622		<4	1	<4	1	376.3	4.6	4.6	4	2	106	0.1	0.2	-0.63
ESC1001623		<4	1	<4	1	221.2	-0.7	0.8	4	2	76	0.27	0.35	4.68
ESC1001628		4.5	0.9	4.6	1.1	367.3	1.7	3.2	5	2	106	0.15	0.23	2.76
ESC1001634		<4	1	<4	1	337.3	2.7	4.3	4	2	80	0.2	0.22	1.26
ESC1001650		<4	1	<4	1	351.4	3.1	4.7	4	2	80	0.24	0.22	0.9
ESC1001652 (SY007)		5.3	1.1	5.3	0.9	365.3	2.7	4.2	4	2	97	0.19	0.27	2.61
ESC1001653 (SY010)		4.8	0.1	5.8	8.9	395.4	2.6	4.1	4	2	97	0.52	0.23	2.16
ESC1001692		4.2	0.3	4.7	3.2	353.3	0.5	2	5	3	122	0.11	0.23	3.68
ESC1001693		<4	0.4	4.4	2.5	332.3	0.5	2	4	3	109	0.35	0.23	3.51
ESC1001694		<4	0.5	4.3	2	360.3	-0.6	0.9	5	3	118	0.39	0.22	4.61
ESC1001696		<4	1	<4	1	361.3	3.1	4.6	4	1	94	0.1	0.21	0.92
ESC1001701		4.8	6.3	<4	0.2	379.4	4.4	4.4	4	1	86	0.23	0.24	0.41
ESC1001702		<4	1	<4	1	351.4	1.4	1.4	4	2	80	0.24	0.22	2.6
ESC1001703		4.1	0.4	4.5	2.2	358.3	1.4	2.9	4	3	109	0.42	0.22	2.69
ESC1001704		<4	0.8	4.1	1.3	372.4	1.6	3.1	4	2	100	0.45	0.21	2.38
ESC1001711		4.7	0.4	5.1	2.8	403.3	1.3	2.8	5	3	122	0.09	0.22	3.33
ESC1001742		5	3.2	4.5	0.3	337.3	1.8	3.2	4	2	97	0.11	0.28	3.2
ESC1001771		4.3	1.8	<4	0.6	365.3	3.9	3.9	4	1	86	0.19	0.22	0.32
ESC1001772		<4	1	<4	1	364.3	3.3	3.3	3	2	88	0.19	0.21	0.71
ESC1001792		<4	1	<4	1	373.4	3.9	3.9	3	2	88	0.14	0.2	0.1
ESC1001793		<4	1	<4	1	378.4	3.5	3.5	3	1	80	0.23	0.2	0.51
ESC1001860		5	1.4	4.8	0.7	377.3	2.6	4	4	2	97	0.23	0.25	2.38
ESC1001866 (SY009)		5.4	7.9	4.5	0.1	379.4	3	4.4	4	2	97	0.23	0.27	2.45
ESC1001867 (SY006)		5.2	3.5	4.65	0.3	393.4	3.4	4.9	4	2	97	0.26	0.25	1.8
ESC1001876		4.6	0.3	5.1	3.2	403.3	1.3	2.8	5	3	122	0.09	0.21	3.27
ESC1001877		4.4	0.6	4.6	1.6	382.3	1.1	2.6	5	3	118	0.15	0.22	3.23
ESC1001878		4.4	0.5	4.7	2	478.5	0.5	2	6	3	132	0.28	0.18	3.89
ESC1001889		<4	1	<4	1	321.3	3.9	3.9	2	1	59	0.2	0.23	0.07
ESC1001890		<4	1	<4	1	365.4	4	4	3	2	80	0.27	0.21	0.03
ESC1001895		<4	1	<4	1	349.3	3.8	3.8	3	1	76	0.19	0.22	0.19
ESC1001896 (SY003)		<4	0.4	4.4	2.5	337.3	1.8	3.2	4	2	97	0.11	0.22	2.25
ESC1001903		5	4.5	4.3	0.2	419.4	3.9	5.4	4	2	97	0.32	0.22	1.01
ESC1001904		<4	1	<4	1	407.4	5	5	4	1	86	0.29	0.19	-0.99
ESC1001905 (SY005)		5	6.3	<4	0.2	393.4	4.6	4.6	4	1	86	0.26	0.23	0.16
ESC1001906		<4	1	<4	1	399.4	5	5	4	1	86	0.52	0.19	-0.97
ESC1001907		4.2	1.6	<4	0.6	401.4	3.2	3.2	5	1	95	0.5	0.2	1
ESC1001908 (SY004)		4.7	4	4.1	0.3	373.4	1.2	2.6	5	2	106	0.45	0.24	3.55
ESC1001909 (SY008)		4.5	2.8	<4	0.4	387.4	2.9	2.9	5	1	95	0.48	0.22	1.6
ESC1001913		<4	1	<4	1	385.4	4.6	4.6	4	1	86	0.5	0.2	-0.62
ESC1001918		<4	1	<4	1	375.3	2.7	3.1	5	2	114	0.15	0.2	1.33
ESC1001919		4.9	6.3	4.1	0.2	447.8	3.9	5.4	4	2	97	0.08	0.21	0.97
ESC1001920 (SY011)		5	2	4.7	0.5	371.4	2.9	4.4	4	2	97	0.48	0.26	2.08
ESC1001954		<4	0.6	4.2	1.6	367.3	1.7	3.2	5	2	106	0.15	0.21	2.26
ESC1001955		4.9	1.6	4.7	0.6	367.3	1.7	3.2	5	2	106	0.15	0.25	3.16
ESC1001956		4.3	0.6	4.5	1.6	352.3	1	2.5	5	3	123	0.11	0.23	3.3
Abbreviations: AlogP, clogD, calculated measurements of lipophilicity; HBA, hydrogen bond acceptors; HBO, Hydrogen Bond Donors; PSA, polar surface area;Fsp3, fraction sp3; LiPE, lipophilic efficiency; LE, ligand efficiency
